# Supplementary material for: Gli1+ progenitors mediate bone anabolic function of teriparatide via Hh and Igf signaling
Source: PubMed Central journal article supplement (PMC8432334; doi:10.1016/j.celrep.2021.109542), 2021-08-17
Supplement: NIHMS1734077-supplement-1.pdf [file NIHMS1734077-supplement-1.pdf]

**Cell Reports, Volume 36**

**Supplemental information**

**Gli1<sup>+</sup> progenitors mediate bone anabolic function  
of teriparatide via Hh and Igf signaling**

**Yu Shi, Xueyang Liao, James Y. Long, Lutian Yao, Jianquan Chen, Bei Yin, Feng Lou, Guangxu He, Ling Ye, Ling Qin, and Fanxin Long**

## Supplemental Information

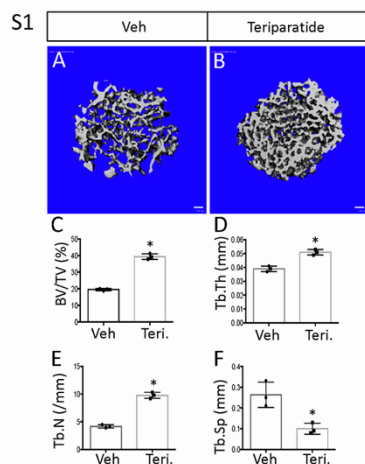

### Figure S1. Related to Fig. 1. Teriparatide increases trabecular bone mass in growing mice.

One-month-old mice with the genotype of *Gli1-CreER<sup>T2</sup>; Ai9; Col1GFP* were injected daily with teriparatide for 21 days after TAM induction.

(A, B) 3-D reconstruction of trabecular bone of the distal femur by microCT. Scale bars, 100  $\mu$ m.

(C-F) Trabecular bone parameters of the distal femur by microCT. BV/TV, bone volume over total volume;

Tb.Th, trabecular thickness; Tb.N, trabecular number; Tb.Sp, trabecular separation. \*:  $p < 0.05$ ,  $n = 3$ , student's t-test.

Error bars: SD.

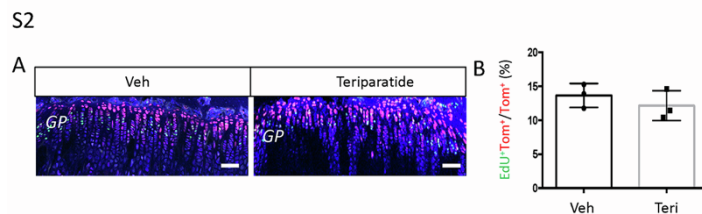

### Figure S2. Related to Fig. 1. Teriparatide does not affect chondrocyte proliferation.

(A) Representative confocal images of the growth plate in proximal tibia of *Gli1CreER<sup>T2</sup>;Ai9* mice injected with teriparatide or veh for 3 days after TM. Scale bar, 100  $\mu$ m.

(B) Quantification of EdU labeling among *tdTomato<sup>+</sup>* cells.  $N = 3$ . Error bar: std.

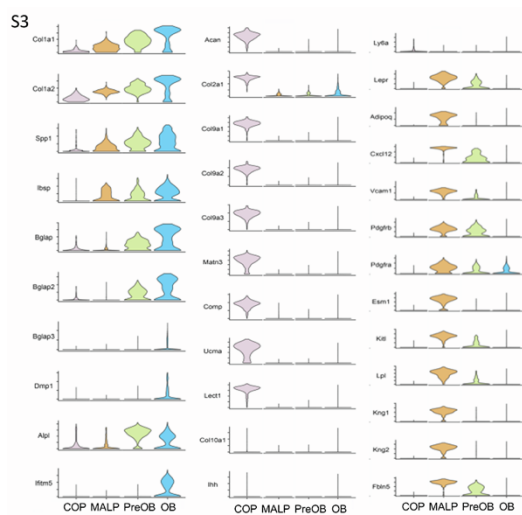

**Figure S3. Related to Fig. 2. Violin plots of selected gene expression in various t-SNE clusters.**

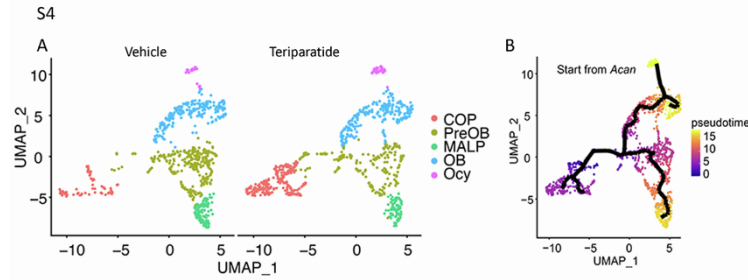

**Figure S4. Related to Fig. 2. Clustering and trajectory analysis of scRNA-seq data.**

(A) UMAP clustering showing expansion of COP population by teriparatide. (B) Trajectory analysis of integrated data based on with Monocle 3.

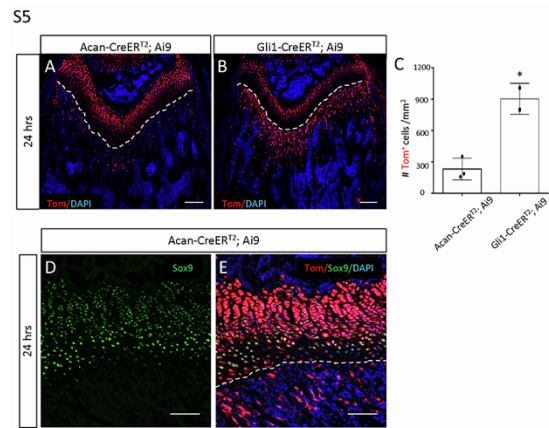

**Figure S5. Related to Fig. 3. Acan-CreER<sup>12</sup> targets COP in primary spongiosa.**

(A, B) Representative images of longitudinal sections through the distal end of femur from mice with indicated genotype. The mice were dosed with TAM once daily for three days starting at 28 days of age and harvested 24 hrs after last dosing. Dotted line denotes the boundary between growth plate and primary spongiosa. Scale bar: 200  $\mu$ m. (C) Quantification of tdTomato+ cells within the primary spongiosa region (200  $\mu$ m below the growth plate and across the width from periosteum on one side to the other). \*:  $p < 0.05$ , student's t test, N= 2 or 3 as indicated. Error bars: SD.

(D, E) Immunofluorescence staining of Sox9 on longitudinal sections of distal femur from mice dosed in the same way as above. Dotted line denotes boundary between growth plate and primary spongiosa. Scale bar: 100  $\mu$ m.

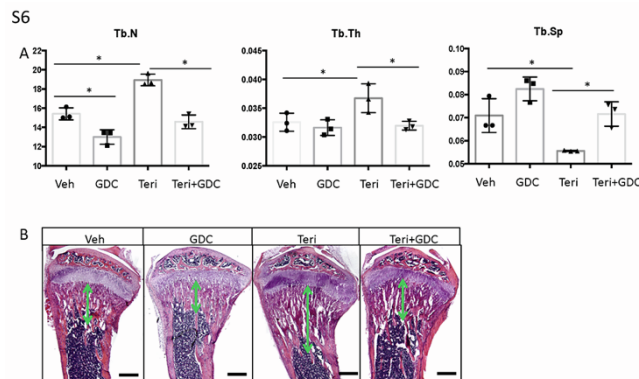

**Figure S6. Related to Fig. 6. Hh inhibitor abolishes bone anabolic effect of teriparatide.**

(A) Trabecular bone parameters of proximal tibia by  $\mu$ CT in wild type mice with indicated treatments for 10 days. \*:  $p < 0.05$ ,  $n=3$ , two-way ANOVA. Error bars: SD.

(B) H&E staining of longitudinal sections through the proximal tibia. Double-headed arrows denote trabecular bone region. Scale bar: 500  $\mu$ m.

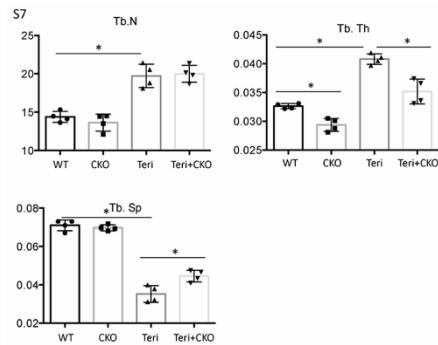

**Figure S7. Related to Fig. 7. Igf signaling in MMPs mediates bone anabolic effect of teriparatide.** Trabecular bone parameters in proximal tibia by  $\mu$ CT. Tb.Th, trabecular thickness; Tb.N, trabecular number; Tb. Sp, trabecular separation. \*:  $p < 0.05$ ,  $n = 4$ , two-way ANOVA. Error bars: SD.

**Table S1. Osteoblast genes upregulated by teriparatide (adj. p value <0.05), related to figure 2**

| <b>OB</b>        |                     |             |                       |                     |
|------------------|---------------------|-------------|-----------------------|---------------------|
| <b>Gene_name</b> | <b>Teriparatide</b> | <b>Ctrl</b> | <b>log2FoldChange</b> | <b>p value adj.</b> |
| <b>Mepe</b>      | 9.0777407           | 1.5984315   | 2.40864179            | 3.27E-06            |
| <b>Dmp1</b>      | 17.5897159          | 6.64350728  | 1.384023316           | 0.00072508          |
| <b>Spp1</b>      | 318.871648          | 132.344947  | 1.267840155           | 0.00023216          |
| <b>Sost</b>      | 0.18145602          | 4.16E-17    | 1.232158166           | 2.03E-06            |
| <b>Ibsp</b>      | 35.1029097          | 17.2279159  | 1.023080885           | 7.48E-05            |
| <b>Phex</b>      | 2.97786455          | 1.53991044  | 0.903718112           | 0.00580263          |
| <b>Igf1r</b>     | 0.51172502          | 0.26877033  | 0.712284935           | 0.00061673          |
| <b>Runx3</b>     | 0.24985181          | 0.11985354  | 0.685275545           | 0.01811181          |
| <b>Runx2</b>     | 1.63327506          | 1.10661507  | 0.517875749           | 0.0049993           |
| <b>COP</b>       |                     |             |                       |                     |
| <b>Gene_name</b> | <b>Teriparatide</b> | <b>Ctrl</b> | <b>log2FoldChange</b> | <b>p value adj.</b> |
| <b>Spp1</b>      | 79.6257212          | 5.6656089   | 3.765964542           | 3.57E-05            |
| <b>Bglap</b>     | 7.12849537          | 1.5878098   | 2.064941224           | 0.00122549          |
| <b>Bglap2</b>    | 3.61905627          | 0.9253039   | 1.805996461           | 0.01239873          |
| <b>Pth1r</b>     | 21.857693           | 11.7368716  | 0.889462793           | 0.00122549          |
| <b>Mgp</b>       | 1535.63859          | 830.105372  | 0.887362707           | 0.0015243           |
| <b>Runx3</b>     | 8.44393483          | 5.02217675  | 0.727641422           | 0.00028417          |
| <b>Igf1r</b>     | 3.55561895          | 2.44633204  | 0.501523514           | 0.00877632          |
| <b>MALP</b>      |                     |             |                       |                     |
| <b>Gene_name</b> | <b>Teriparatide</b> | <b>Ctrl</b> | <b>log2FoldChange</b> | <b>p value adj.</b> |
| <b>Igf1r</b>     | 1.41764315          | 0.58445898  | 1.12093741            | 1.83E-06            |
| <b>Runx3</b>     | 0.4429948           | 0.20982488  | 0.755811899           | 0.03278384          |
| <b>Runx2</b>     | 3.38584968          | 2.06855003  | 0.66985307            | 0.00018058          |
| <b>Col1a2</b>    | 32.5810338          | 21.5872848  | 0.591683594           | 0.0001039           |
| <b>Runx1</b>     | 9.41439148          | 7.29164917  | 0.356351682           | 0.04347791          |
| <b>PreOB</b>     |                     |             |                       |                     |
| <b>Gene_name</b> | <b>Teriparatide</b> | <b>Ctrl</b> | <b>log2FoldChange</b> | <b>p value adj.</b> |
| <b>Ibsp</b>      | 35.1973347          | 2.87881181  | 3.553566065           | 5.14E-18            |
| <b>Spp1</b>      | 158.306014          | 15.2091273  | 3.370175069           | 6.12E-22            |
| <b>Mgp</b>       | 7.29253118          | 1.42200914  | 2.265824032           | 2.74E-10            |
| <b>Mmp13</b>     | 28.2094678          | 5.82654048  | 2.245066959           | 2.72E-09            |
| <b>Enpp1</b>     | 0.60317565          | 0.02809828  | 2.222976672           | 1.06E-08            |
| <b>Dmp1</b>      | 0.52975239          | 1.39E-17    | 2.191031879           | 1.14E-05            |
| <b>Postn</b>     | 8.55677376          | 2.27527289  | 1.859864679           | 4.84E-06            |
| <b>Col1a2</b>    | 116.207557          | 41.9731649  | 1.466451914           | 4.43E-08            |
| <b>Sparc</b>     | 61.3568624          | 24.71528    | 1.307552181           | 7.71E-07            |
| <b>Col1a1</b>    | 136.120292          | 57.6667035  | 1.23744936            | 0.00079425          |
| <b>Bgn</b>       | 13.8732873          | 6.28057894  | 1.125676081           | 1.56E-09            |
| <b>Runx1</b>     | 2.69878894          | 1.4830065   | 0.815731883           | 0.00199852          |

**Table S2. Gene Ontology Enrichment by Teriparatide in COP, Related to Figure 2**

| Annotation Cluster 1 | Enrichment Score: 40.72            | Count | P_Value  | Fold Change | Benjamini |
|----------------------|------------------------------------|-------|----------|-------------|-----------|
| UP_KEYWORDS          | Ribonucleoprotein                  | 66    | 1.70E-49 | 1.20E+01    | 4.90E-47  |
| KEGG_PATHWAY         | Ribosome                           | 54    | 1.10E-47 | 1.40E+01    | 2.10E-45  |
| UP_KEYWORDS          | Ribosomal protein                  | 55    | 6.30E-47 | 1.50E+01    | 9.00E-45  |
| GOTERM_MF_DIRECT     | Structural constituent of ribosome | 56    | 3.10E-39 | 1.00E+01    | 1.60E-36  |
| GOTERM_CC_DIRECT     | Ribosome                           | 49    | 6.50E-39 | 1.30E+01    | 2.10E-36  |
| GOTERM_BP_DIRECT     | Translation                        | 53    | 2.00E-26 | 6.30E+00    | 3.60E-23  |
| Annotation Cluster 2 | Enrichment Score: 18.24            | Count | P_Value  | Fold Change | Benjamini |
| KEGG_PATHWAY         | Oxidative phosphorylation          | 37    | 3.20E-26 | 9.80E+00    | 3.00E-24  |
| KEGG_PATHWAY         | Parkinson's disease                | 34    | 9.90E-22 | 8.40E+00    | 6.20E-20  |
| UP_KEYWORDS          | Mitochondrion inner membrane       | 33    | 1.10E-17 | 7.00E+00    | 5.40E-16  |
|                      | Non-alcoholic fatty liver          |       |          |             |           |
| KEGG_PATHWAY         | disease                            | 30    | 6.60E-17 | 7.10E+00    | 3.10E-15  |
| KEGG_PATHWAY         | Huntington's disease               | 32    | 7.90E-16 | 6.00E+00    | 3.00E-14  |
| KEGG_PATHWAY         | Alzheimer's disease                | 30    | 2.10E-15 | 6.30E+00    | 6.40E-14  |
| Annotation Cluster 3 | Enrichment Score: 16.89            | Count | P_Value  | Fold Change | Benjamini |
| UP_KEYWORDS          | Respiratory chain                  | 21    | 6.50E-20 | 1.80E+01    | 4.70E-18  |
| GOTERM_CC_DIRECT     | Respiratory chain                  | 19    | 5.70E-17 | 1.60E+01    | 3.10E-15  |
| UP_KEYWORDS          | Electron transport                 | 22    | 5.70E-16 | 1.10E+01    | 2.30E-14  |

**Table S3. Gene Ontology Enrichment by Teriparatide in MALP, Related to Figure 2**

| Annotation Cluster 1 | Enrichment Score: 45.39            | Count | P_Value  | Fold Change | Benjamini |
|----------------------|------------------------------------|-------|----------|-------------|-----------|
| KEGG_PATHWAY         | Ribosome                           | 68    | 4.40E-58 | 1.20E+01    | 9.60E-56  |
| UP_KEYWORDS          | Ribosomal protein                  | 69    | 3.40E-55 | 1.20E+01    | 1.00E-52  |
| GOTERM_CC_DIRECT     | Ribosome                           | 65    | 2.10E-49 | 1.10E+01    | 9.20E-47  |
| UP_KEYWORDS          | Ribonucleoprotein                  | 74    | 2.40E-47 | 8.80E+00    | 3.70E-45  |
| GOTERM_MF_DIRECT     | structural constituent of ribosome | 71    | 2.40E-45 | 8.60E+00    | 1.60E-42  |
|                      | intracellular ribonucleoprotein    |       |          |             |           |
| GOTERM_CC_DIRECT     | complex                            | 65    | 7.20E-34 | 6.60E+00    | 1.50E-31  |
| GOTERM_BP_DIRECT     | translation                        | 72    | 1.40E-33 | 5.70E+00    | 3.60E-30  |
| Annotation Cluster 2 | Enrichment Score: 13.37            | Count | P_Value  | Fold Change | Benjamini |
| KEGG_PATHWAY         | Oxidative phosphorylation          | 36    | 6.20E-20 | 6.80E+00    | 6.80E-18  |
| KEGG_PATHWAY         | Parkinson's disease                | 32    | 3.40E-15 | 5.60E+00    | 2.50E-13  |
| KEGG_PATHWAY         | Alzheimer's disease                | 32    | 4.90E-13 | 4.70E+00    | 2.70E-11  |
| KEGG_PATHWAY         | NAFLD                              | 28    | 2.60E-11 | 4.70E+00    | 1.20E-09  |
| KEGG_PATHWAY         | Huntington's disease               | 31    | 5.40E-11 | 4.10E+00    | 2.00E-09  |
| Annotation Cluster 3 | Enrichment Score: 12.65            | Count | P_Value  | Fold Change | Benjamini |
| UP_KEYWORDS          | Respiratory chain                  | 20    | 2.00E-15 | 1.20E+01    | 1.20E-13  |
| GOTERM_CC_DIRECT     | respiratory chain                  | 19    | 6.40E-14 | 1.10E+01    | 3.10E-12  |
| UP_KEYWORDS          | Electron transport                 | 20    | 8.30E-11 | 6.80E+00    | 3.60E-09  |

**Table S4. Gene Ontology Enrichment by Teriparatide in PreOB, Related to Figure 2**

| Annotation Cluster 1 | Enrichment Score: 24.87            | Count | P_Value  | Fold Change | Benjamini |
|----------------------|------------------------------------|-------|----------|-------------|-----------|
| UP_KEYWORDS          | Ribonucleoprotein                  | 55    | 3.70E-28 | 6.50E+00    | 6.50E-26  |
| UP_KEYWORDS          | Ribosomal protein                  | 46    | 4.00E-28 | 8.30E+00    | 6.50E-26  |
| KEGG_PATHWAY         | Ribosome                           | 45    | 1.30E-26 | 7.30E+00    | 3.10E-24  |
| GOTERM_CC_DIRECT     | ribosome                           | 42    | 2.00E-23 | 7.20E+00    | 3.40E-21  |
| GOTERM_MF_DIRECT     | structural constituent of ribosome | 47    | 1.10E-21 | 5.70E+00    | 8.00E-19  |
| Annotation Cluster 2 | Enrichment Score: 8.41             | Count | P_Value  | Fold Change | Benjamini |
| INTERPRO             | Collagen triple helix repeat       | 18    | 5.00E-11 | 8.10E+00    | 5.80E-08  |
| UP_KEYWORDS          | Collagen                           | 18    | 1.20E-10 | 7.80E+00    | 3.80E-09  |
| GOTERM_CC_DIRECT     | collagen trimer                    | 18    | 5.30E-10 | 7.00E+00    | 1.90E-08  |
| KEGG_PATHWAY         | Protein digestion and absorption   | 14    | 7.40E-05 | 3.80E+00    | 1.40E-03  |
| Annotation Cluster 3 | Enrichment Score: 7.82             | Count | P_Value  | Fold Change | Benjamini |
| KEGG_PATHWAY         | Oxidative phosphorylation          | 27    | 9.70E-11 | 4.60E+00    | 1.10E-08  |
| KEGG_PATHWAY         | Alzheimer's disease                | 28    | 4.80E-09 | 3.70E+00    | 2.80E-07  |
| KEGG_PATHWAY         | Parkinson's disease                | 25    | 1.20E-08 | 4.00E+00    | 5.60E-07  |
| KEGG_PATHWAY         | Huntington's disease               | 24    | 9.20E-06 | 2.90E+00    | 2.40E-04  |

**Table S5. Gene Ontology Enrichment by Teriparatide in OB, Related to Figure 2**

| Annotation Cluster 1 | Enrichment Score: 30.53            | Count | P_Value  | Fold Change | Benjamini |
|----------------------|------------------------------------|-------|----------|-------------|-----------|
| UP_KEYWORDS          | Ribonucleoprotein                  | 57    | 4.70E-36 | 8.80E+00    | 1.40E-33  |
| UP_KEYWORDS          | Ribosomal protein                  | 48    | 2.10E-35 | 1.10E+01    | 3.10E-33  |
| KEGG_PATHWAY         | Ribosome                           | 47    | 3.50E-34 | 1.00E+01    | 6.90E-32  |
| GOTERM_MF_DIRECT     | Structural constituent of ribosome | 51    | 6.60E-31 | 8.20E+00    | 3.90E-28  |
| GOTERM_CC_DIRECT     | Ribosome                           | 44    | 2.70E-30 | 1.00E+01    | 1.00E-27  |
| GOTERM_BP_DIRECT     | Translation                        | 49    | 1.00E-20 | 5.20E+00    | 2.20E-17  |
| Annotation Cluster 2 | Enrichment Score: 8.61             | Count | P_Value  | Fold Change | Benjamini |
| UP_KEYWORDS          | Respiratory chain                  | 14    | 4.10E-10 | 1.10E+01    | 2.10E-08  |
| GOTERM_CC_DIRECT     | Respiratory chain                  | 14    | 6.60E-10 | 1.00E+01    | 2.50E-08  |
| UP_KEYWORDS          | Electron transport                 | 15    | 5.30E-08 | 6.70E+00    | 1.80E-06  |
| Annotation Cluster 3 | Enrichment Score: 2.61             | Count | P_Value  | Fold Change | Benjamini |
| INTERPRO             | Ribonucleoprotein LSM domain       | 5     | 9.00E-04 | 1.10E+01    | 2.10E-01  |
| SMART                | Sm                                 | 5     | 1.10E-03 | 1.10E+01    | 2.30E-01  |
| INTERPRO             | Like-Sm (LSM) domain               | 5     | 1.60E-03 | 9.70E+00    | 2.10E-01  |
| GOTERM_CC_DIRECT     | U12-type spliceosomal complex      | 4     | 2.50E-02 | 6.30E+00    | 2.50E-01  |
